# Supplementary material for: Unraveling Epilepsy Biomarkers through Single-Cell Sequencing and GEO Data Integration: A Focus on Parthanatos Pathway
Source: Research Square preprint supplement (doi:10.21203/rs.3.rs-7337638/v1), 2025-08-22
Supplement: Supplementary file 1 [file c3aa078a4cb0c1643e18b88b.docx]

| **Component** | **Volume** |
| --- | --- |
| cDNA | 3ul |
| 2xUniversal Blue SYBR Green qPCR Master Mix | 5ul |
| Forward primer (10µM) | 1ul |
| Reverse primer (10µM) | 1ul |

Supplementary Table 1

Supplementary Table 2

| **Primer** | **Sequence** |
| --- | --- |
| FAM91A1 F | TGGCAGTGAACCCAGTTGTT |
| FAM91A1 R | CAAGGCGCAAACATCAGCTT |
| TSPAN2 F | GCCTCCTGGTGATATTTGCTGC |
| TSPAN2 R | CCGACAATTCCAATGAGCTGG |
| HNRNPH2 F | TGCTAAGGCTTGAGTGCGTT |
| HNRNPH2 R | GCTCTTGGTGGCAAGTTTGG |
| HAUS4 F | CCCCAGGGTGTGCAGATTAGA |
| HAUS4 R | GCCACTCTCATCCACATGCT |
| SRPK1 F | GTGGTGCCGTTATGCAATCC |
| SRPK1 R | AGGATTTCCCTGCCGTTGTT |
| Housekeeping gene-GAPDH F | CGAAGGTGGAGTCAACGGATTT |
| Housekeeping gene-GAPDH R | ATGGGTGGAATCATATTGGAAC |

Supplementary Table 3

|  | Temperature | Time |
| --- | --- | --- |
| Initial denaturation | 95℃ | 1min |
| Denaturation | 95℃ | 20s |
| Annealing | 55℃ | 20s |
| Extension | 72℃ | 30s |
